# Supplementary material for: HSRL-2 Retrievals of Ocean Surface Wind Speeds
Source: Copernicus journal article supplement (doi:10.5194/egusphere-2023-1943), 2023-09-19
Supplement: Supplementary file 1 [file egusphere-2023-1943-supplement.pdf]

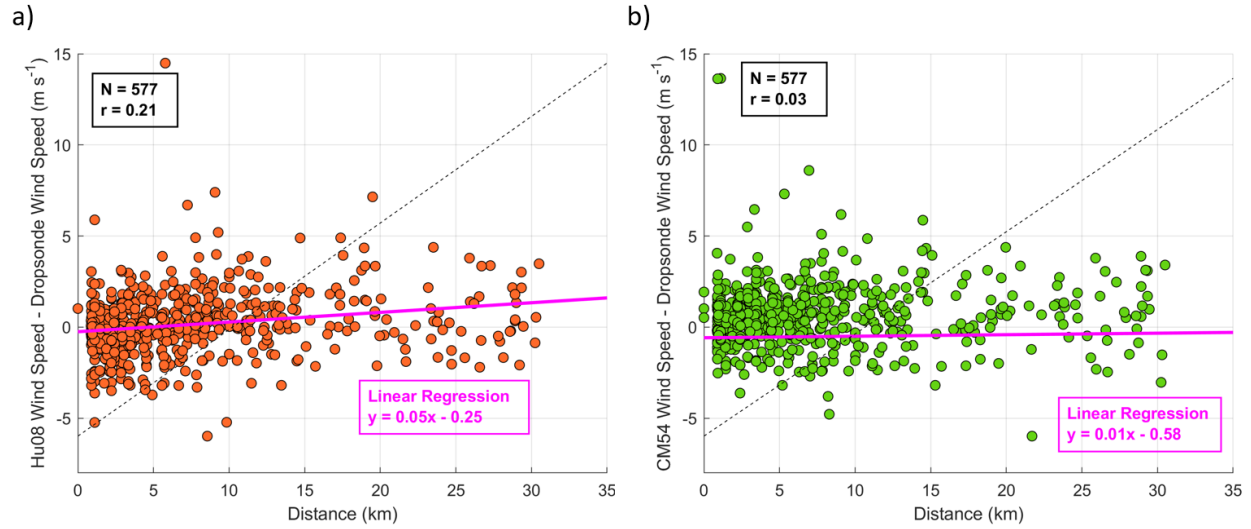

Figure S1: Distance between HSRL-2 retrieval and dropsonde measurement versus a) Hu08 minus dropsonde wind speed and b) CM54 minus dropsonde wind speed to observe how distance affects agreement in wind speed intercomparisons.

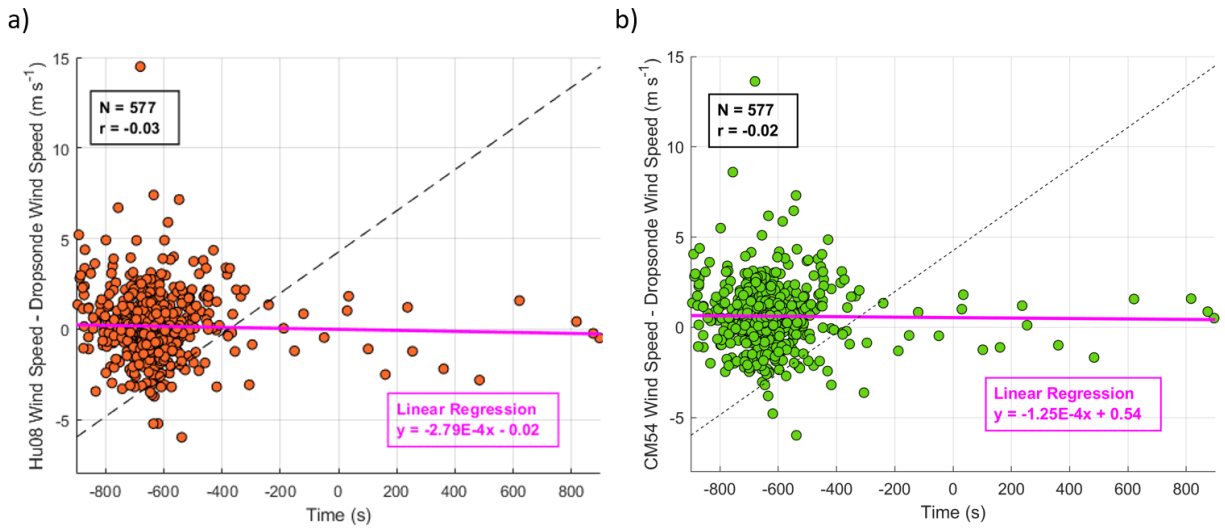

Figure S2: Time between HSRL-2 retrieval and dropsonde measurement versus a) Hu08 minus dropsonde wind speed and b) CM54 minus dropsonde wind speed to observe how time affects agreement in wind speed intercomparisons.
